# Supplementary material
Source: publisher figshare collection journal article supplement (https://sage.figshare.com/ndownloader/files/37675884)
Supplement: Supplementary file 1 [file 37675884]

## Supplemental Material



### **PARTICIPANTS NEEDED FOR SURVEY ON RUNNING AND KNEE HEALTH!**

The Motion Analysis and Biofeedback Laboratory at The University of British Columbia (principal investigator: Dr. Michael Hunt) is leading a worldwide online survey on perceptions about running and knee health. An online educational module is also provided.

**We are looking for people (aged 18+ years) who speak English, French, Spanish, Dutch, Portuguese, Danish or Italian**

- **Runners (with or without knee osteoarthritis)**
- **Non-runners (with or without knee osteoarthritis)**
- **Healthcare professionals**

*If you are interested, please follow this link*

[https://ubc.ca1.qualtrics.com/jfe/form/SV\\_d5vfGTuZ3gLkllV](https://ubc.ca1.qualtrics.com/jfe/form/SV_d5vfGTuZ3gLkllV)

*or contact Dr. Jean-Francois Esculier at  
jean-francois.esculier@ubc.ca for further details*

*Please note: If you choose to post to the page, or "like" the page, or "follow" it (e.g. on Facebook), you will be identified personally.*

Version 2

Page 1 of 1

June 2, 2020

**Supplemental Figure S1.** Survey advertisement.

**Supplemental Table S1. Demographics of Survey Respondents by Language**

|                               | <b>English<br/>(n=1747)</b> | <b>Spanish<br/>(n=672)</b> | <b>French<br/>(n=593)</b> | <b>Portuguese<br/>(n=568)</b> | <b>Italian<br/>(n=495)</b> | <b>Danish<br/>(n=345)</b> | <b>Dutch<br/>(n=101)</b> |
|-------------------------------|-----------------------------|----------------------------|---------------------------|-------------------------------|----------------------------|---------------------------|--------------------------|
| <b>Participant split</b>      |                             |                            |                           |                               |                            |                           |                          |
| PUB                           | 886 (50.7)                  | 493 (73.4)                 | 298 (50.3)                | 315 (55.5)                    | 276 (55.8)                 | 170 (49.3)                | 76 (75.2)                |
| HCP                           | 861 (49.3)                  | 179 (26.6)                 | 295 (49.7)                | 253 (44.5)                    | 219 (44.2)                 | 175 (50.7)                | 25 (24.8)                |
| <b>Age, y, mean ± SD</b>      | 41.3 ± 12.8                 | 38.7 ± 10.4                | 37.0 ± 11.4               | 34.5 ± 11.7                   | 37.6 ± 10.3                | 40.6 ± 11.1               | 44.0 ± 11.6              |
| <b>Gender</b>                 |                             |                            |                           |                               |                            |                           |                          |
| Woman                         | 977 (55.9)                  | 294 (43.8)                 | 260 (43.8)                | 314 (55.3)                    | 146 (29.5)                 | 187 (54.2)                | 49 (48.5)                |
| Man                           | 758 (43.4)                  | 377 (56.1)                 | 331 (55.8)                | 254 (44.7)                    | 349 (70.5)                 | 156 (45.2)                | 52 (51.5)                |
| Gender-fluid                  | 3 (0.2)                     | 0 (0)                      | 0 (0)                     | 0 (0)                         | 0 (0)                      | 1 (0.3)                   | 0 (0)                    |
| Nonbinary                     | 4 (0.2)                     | 1 (0.1)                    | 0 (0)                     | 0 (0)                         | 0 (0)                      | 1 (0.3)                   | 0 (0)                    |
| Two-spirit                    | 1 (0.1)                     | 0 (0)                      | 1 (0.1)                   | 0 (0)                         | 0 (0)                      | 0 (0)                     | 0 (0)                    |
| Prefer not to answer          | 4 (0.2)                     | 0 (0)                      | 1 (0.1)                   | 0 (0)                         | 0 (0)                      | 0 (0)                     | 0 (0)                    |
| <b>Level of education</b>     |                             |                            |                           |                               |                            |                           |                          |
| Below high school             | 3 (0.2)                     | 11 (1.6)                   | 9 (1.5)                   | 0 (0)                         | 15 (3.0)                   | 7 (2.0)                   | 1 (1.0)                  |
| High school                   | 42 (2.4)                    | 34 (5.1)                   | 41 (6.9)                  | 21 (3.7)                      | 97 (19.6)                  | 41 (11.9)                 | 5 (5.0)                  |
| Non-university                | 87 (5.0)                    | 48 (7.1)                   | 41 (6.9)                  | 106 (18.7)                    | 12 (2.4)                   | 53 (15.4)                 | 46 (45.5)                |
| University                    | 1615 (92.4)                 | 579 (86.2)                 | 502 (84.7)                | 441 (77.6)                    | 371 (74.9)                 | 244 (70.7)                | 49 (48.5)                |
| <b>General health status</b>  |                             |                            |                           |                               |                            |                           |                          |
| Excellent                     | 719 (41.2)                  | 193 (28.7)                 | 183 (30.9)                | 130 (22.9)                    | 88 (17.8)                  | 98 (28.4)                 | 37 (36.6)                |
| Very good                     | 760 (43.5)                  | 348 (51.8)                 | 292 (49.2)                | 265 (46.7)                    | 235 (47.5)                 | 185 (53.6)                | 43 (42.6)                |
| Good                          | 237 (13.6)                  | 118 (17.6)                 | 113 (19.1)                | 146 (25.7)                    | 150 (30.3)                 | 53 (15.4)                 | 17 (16.8)                |
| Fair                          | 28 (1.6)                    | 13 (1.9)                   | 5 (0.8)                   | 25 (4.4)                      | 20 (4.0)                   | 7 (2.0)                   | 4 (4.0)                  |
| Poor                          | 3 (0.2)                     | 0 (0)                      | 0 (0)                     | 2 (0.4)                       | 2 (0.4)                    | 2 (0.6)                   | 0 (0)                    |
| <b>Currently a runner</b>     | 1359 (77.8)                 | 549 (81.7)                 | 499 (84.1)                | 352 (62.0)                    | 366 (73.9)                 | 256 (74.2)                | 85 (84.2)                |
| <b>Diagnosed with KOA</b>     | 213 (12.2)                  | 59 (8.8)                   | 54 (9.1)                  | 62 (10.9)                     | 93 (18.8)                  | 50 (14.5)                 | 19 (18.8)                |
| <b>History of knee injury</b> |                             |                            |                           |                               |                            |                           |                          |
| No                            | 627 (35.9)                  | 257 (38.2)                 | 229 (38.6)                | 305 (53.7)                    | 204 (41.2)                 | 110 (31.9)                | 27 (26.7)                |
| Yes, without surgery          | 832 (47.6)                  | 345 (51.3)                 | 285 (48.1)                | 211 (37.1)                    | 210 (42.4)                 | 156 (45.2)                | 56 (55.4)                |
| Yes, with surgery             | 288 (16.5)                  | 70 (10.4)                  | 79 (13.3)                 | 52 (9.2)                      | 81 (16.4)                  | 79 (22.9)                 | 18 (17.8)                |

Data are presented as n (%) unless stated otherwise. HCP, health care professional; KOA, knee osteoarthritis; PUB, general public.

**Supplemental Table S2. Detailed Response Proportions for Survey Questions**

|                                                                                               | PUB                            | HCP   | P-value | Runner                         | Nonrunner | P-value |
|-----------------------------------------------------------------------------------------------|--------------------------------|-------|---------|--------------------------------|-----------|---------|
| In general, regular running (at least once per week) is _____ for the knee joint.             |                                |       |         |                                |           |         |
| Healthy (very, somewhat)                                                                      | 67.9%                          | 85.8% | <0.001  | 76.8%                          | 75.5%     | 0.399   |
| Neither healthy nor unhealthy                                                                 | 20.0%                          | 10.9% | <0.001  | 15.4%                          | 16.2%     | 0.557   |
| Unhealthy (somewhat, very)                                                                    | 8.0%                           | 2.4%  | <0.001  | 5.4%                           | 5.5%      | 0.880   |
| I don't know                                                                                  | 4.1%                           | 0.9%  | <0.001  | 2.4%                           | 2.8%      | 0.489   |
|                                                                                               | $\chi^2$ (3, n=4,521) = 210.09 |       | <0.001  | $\chi^2$ (3, n=4,521) = 0.950  |           | 0.813   |
|                                                                                               | Cramer's V = 0.22 (moderate)   |       |         | Cramer's V = 0.02 (negligible) |           |         |
| Running frequently (at least 3 times per week) _____ the risk of getting KOA.                 |                                |       |         |                                |           |         |
| Increases (greatly, somewhat)                                                                 | 28.5%                          | 12.5% | <0.001  | 20.4%                          | 21.7%     | 0.383   |
| Does not change                                                                               | 32.9%                          | 38.1% | <0.001  | 38.6%                          | 34.2%     | 0.008   |
| Decreases (somewhat, greatly)                                                                 | 24.7%                          | 46.4% | <0.001  | 36.0%                          | 33.8%     | 0.180   |
| I don't know                                                                                  | 13.9%                          | 3.0%  | <0.001  | 4.9%                           | 10.4%     | <0.001  |
|                                                                                               | $\chi^2$ (3, n=4,521) = 442.23 |       | <0.001  | $\chi^2$ (3, n=4,521) = 32.30  |           | <0.001  |
|                                                                                               | Cramer's V = 0.31 (large)      |       |         | Cramer's V = 0.09 (small)      |           |         |
| Running long distances (such as marathons and ultra-marathons) _____ the risk of getting KOA. |                                |       |         |                                |           |         |
| Increases (greatly, somewhat)                                                                 | 54.4%                          | 45.1% | <0.001  | 54.4%                          | 49.0%     | 0.003   |
| Does not change                                                                               | 22.4%                          | 33.6% | <0.001  | 26.4%                          | 27.6%     | 0.450   |
| Decreases (somewhat, greatly)                                                                 | 8.1%                           | 15.6% | <0.001  | 11.9%                          | 11.3%     | 0.591   |
| I don't know                                                                                  | 15.1%                          | 5.7%  | <0.001  | 7.3%                           | 12.1%     | <0.001  |
|                                                                                               | $\chi^2$ (3, n=4,521) = 214.60 |       | <0.001  | $\chi^2$ (3, n=4,521) = 21.78  |           | <0.001  |
|                                                                                               | Cramer's V = 0.22 (moderate)   |       |         | Cramer's V = 0.07 (small)      |           |         |
| Running on hard surfaces _____ the risk of getting KOA.                                       |                                |       |         |                                |           |         |
| Increases (greatly, somewhat)                                                                 | 59.8%                          | 35.7% | <0.001  | 47.6%                          | 49.6%     | 0.269   |
| Does not change                                                                               | 25.1%                          | 52.5% | <0.001  | 40.6%                          | 36.3%     | 0.011   |
| Decreases (somewhat, greatly)                                                                 | 3.9%                           | 7.0%  | <0.001  | 5.0%                           | 5.3%      | 0.730   |
| I don't know                                                                                  | 11.2%                          | 4.8%  | <0.001  | 6.7%                           | 8.9%      | 0.031   |
|                                                                                               | $\chi^2$ (3, n=4,521) = 431.44 |       | <0.001  | $\chi^2$ (3, n=4,521) = 9.07   |           | 0.028   |
|                                                                                               | Cramer's V = 0.31 (large)      |       |         | Cramer's V = 0.05 (negligible) |           |         |

*continued*

|                                                                                                                               | PUB                            | HCP   | P-value | Runner                        | Nonrunner | P-value |
|-------------------------------------------------------------------------------------------------------------------------------|--------------------------------|-------|---------|-------------------------------|-----------|---------|
| Running with shoes that have more cushioning and support _____ the risk of getting KOA.                                       |                                |       |         |                               |           |         |
| Increases (greatly, somewhat)                                                                                                 | 9.5%                           | 11.1% | <0.001  | 8.7%                          | 10.6%     | 0.079   |
| Does not change                                                                                                               | 30.1%                          | 54.7% | <0.001  | 43.3%                         | 40.3%     | 0.076   |
| Decreases (somewhat, greatly)                                                                                                 | 50.0%                          | 29.4% | <0.001  | 42.4%                         | 40.4%     | 0.254   |
| I don't know                                                                                                                  | 10.4%                          | 4.8%  | <0.001  | 5.5%                          | 8.7%      | <0.001  |
|                                                                                                                               | $\chi^2$ (3, n=4,521) = 327.69 |       | <0.001  | $\chi^2$ (3, n=4,521) = 15.62 |           | 0.001   |
|                                                                                                                               | Cramer's V = 0.27 (moderate)   |       |         | Cramer's V = 0.06 (small)     |           |         |
| It is _____ for a non-runner with KOA to start a running program if they don't have symptoms before or after they go running. |                                |       |         |                               |           |         |
| Appropriate (very, somewhat)                                                                                                  | 49.4%                          | 74.4% | <0.001  | 62.7%                         | 59.8%     | 0.089   |
| Neither appropriate nor inappropriate                                                                                         | 13.8%                          | 12.2% | 0.123   | 14.6%                         | 12.6%     | 0.087   |
| Inappropriate (somewhat, very)                                                                                                | 19.1%                          | 10.0% | <0.001  | 16.7%                         | 14.5%     | 0.082   |
| I don't know                                                                                                                  | 17.8%                          | 3.3%  | <0.001  | 5.9%                          | 13.0%     | <0.001  |
|                                                                                                                               | $\chi^2$ (3, n=4,521) = 343.02 |       | <0.001  | $\chi^2$ (3, n=4,521) = 42.50 |           | <0.001  |
|                                                                                                                               | Cramer's V = 0.29 (large)      |       |         | Cramer's V = 0.10 (small)     |           |         |
| People with KOA who continue to run will _____ their risk of getting more knee pain.                                          |                                |       |         |                               |           |         |
| Increase (greatly, somewhat)                                                                                                  | 48.2%                          | 26.3% | <0.001  | 37.6%                         | 38.8%     | 0.497   |
| Not change                                                                                                                    | 16.4%                          | 29.6% | <0.001  | 26.4%                         | 21.0%     | <0.001  |
| Decrease (somewhat, greatly)                                                                                                  | 19.9%                          | 40.4% | <0.001  | 30.7%                         | 28.4%     | 0.158   |
| I don't know                                                                                                                  | 15.4%                          | 3.6%  | <0.001  | 5.2%                          | 11.7%     | <0.001  |
|                                                                                                                               | $\chi^2$ (3, n=4,521) = 541.21 |       | <0.001  | $\chi^2$ (3, n=4,521) = 45.50 |           | <0.001  |
|                                                                                                                               | Cramer's V = 0.35 (large)      |       |         | Cramer's V = 0.10 (small)     |           |         |
| People with KOA who keep running regularly will _____ the need for joint replacement surgery.                                 |                                |       |         |                               |           |         |
| Increase (greatly, somewhat)                                                                                                  | 38.3%                          | 16.7% | <0.001  | 26.4%                         | 29.4%     | 0.059   |
| Not change                                                                                                                    | 21.2%                          | 31.9% | <0.001  | 29.8%                         | 24.8%     | 0.001   |
| Decrease (somewhat, greatly)                                                                                                  | 20.2%                          | 46.1% | <0.001  | 36.3%                         | 30.2%     | <0.001  |
| I don't know                                                                                                                  | 20.4%                          | 5.3%  | <0.001  | 7.4%                          | 15.6%     | <0.001  |
|                                                                                                                               | $\chi^2$ (3, n=4,521) = 650.40 |       | <0.001  | $\chi^2$ (3, n=4,521) = 59.35 |           | <0.001  |
|                                                                                                                               | Cramer's V = 0.38 (large)      |       |         | Cramer's V = 0.12 (small)     |           |         |

continued

|                                                                                                                          | PUB                            | HCP   | P-value | Runner                         | Nonrunner | P-value |
|--------------------------------------------------------------------------------------------------------------------------|--------------------------------|-------|---------|--------------------------------|-----------|---------|
| It is _____ for runners who have KOA to continue if they don't have symptoms before or after they go running.            |                                |       |         |                                |           |         |
| Appropriate (very, somewhat)                                                                                             | 59.1%                          | 85.7% | <0.001  | 77.0%                          | 69.1%     | <0.001  |
| Neither appropriate nor inappropriate                                                                                    | 14.4%                          | 7.9%  | <0.001  | 11.1%                          | 11.6%     | 0.653   |
| Inappropriate (somewhat, very)                                                                                           | 12.1%                          | 4.4%  | <0.001  | 8.5%                           | 8.7%      | 0.776   |
| I don't know                                                                                                             | 14.4%                          | 1.9%  | <0.001  | 3.4%                           | 10.6%     | <0.001  |
|                                                                                                                          | $\chi^2$ (3, n=4,521) = 425.11 |       | <0.001  | $\chi^2$ (3, n=4,521) = 53.61  |           | <0.001  |
|                                                                                                                          | Cramer's V = 0.31 (large)      |       |         | Cramer's V = 0.11 (small)      |           |         |
| People with KOA who continue to run should choose shoes with _____.                                                      |                                |       |         |                                |           |         |
| High-moderate cushioning                                                                                                 | 61.8%                          | 39.8% | <0.001  | 51.0%                          | 52.4%     | 0.411   |
| Low-no cushioning                                                                                                        | 7.1%                           | 14.5% | <0.001  | 10.2%                          | 10.4%     | 0.799   |
| It doesn't matter                                                                                                        | 14.3%                          | 37.1% | <0.001  | 27.6%                          | 23.5%     | 0.007   |
| I don't know                                                                                                             | 16.8%                          | 8.6%  | <0.001  | 11.3%                          | 13.7%     | 0.044   |
|                                                                                                                          | $\chi^2$ (3, n=4,521) = 456.50 |       | <0.001  | $\chi^2$ (3, n=4,521) = 9.48   |           | 0.024   |
|                                                                                                                          | Cramer's V = 0.32 (large)      |       |         | Cramer's V = 0.05 (negligible) |           |         |
| People with KOA who continue to run should _____.                                                                        |                                |       |         |                                |           |         |
| Use a running technique with greater impact on the ground                                                                | 2.5%                           | 1.9%  | 0.001   | 1.5%                           | 2.0%      | 0.326   |
| Run whatever way they want                                                                                               | 14.9%                          | 23.1% | <0.001  | 27.6%                          | 21.7%     | <0.001  |
| Use a running technique with less impact on the ground                                                                   | 66.7%                          | 62.8% | <0.001  | 59.9%                          | 63.7%     | 0.024   |
| I don't know                                                                                                             | 16.0%                          | 12.2% | <0.001  | 11.0%                          | 12.6%     | 0.186   |
|                                                                                                                          | $\chi^2$ (3, n=4,521) = 256.03 |       | <0.001  | $\chi^2$ (3, n=4,521) = 16.31  |           | 0.001   |
|                                                                                                                          | Cramer's V = 0.24 (moderate)   |       |         | Cramer's V = 0.06 (small)      |           |         |
| (PUB who are runners) If I were to develop knee pain (but without a diagnosis of KOA), I would... (check all that apply) |                                |       |         |                                |           |         |
| Stop completely                                                                                                          | 1.1%                           |       |         |                                |           |         |
| Stop temporarily                                                                                                         | 33.8%                          |       |         |                                |           |         |
| Reduce frequency                                                                                                         | 39.9%                          |       |         |                                |           |         |
| Reduce distance                                                                                                          | 42.8%                          |       |         |                                |           |         |
| Reduce speed                                                                                                             | 24.9%                          |       |         |                                |           |         |
| Not change anything                                                                                                      | 9.6%                           |       |         |                                |           |         |

continued

|                                                                                                                                                                              | PUB   | HCP   | P-value | Runner | Nonrunner | P-value |
|------------------------------------------------------------------------------------------------------------------------------------------------------------------------------|-------|-------|---------|--------|-----------|---------|
| <b>(PUB who are runners) If I was diagnosed with KOA by a doctor, I would... (check all that apply)</b>                                                                      |       |       |         |        |           |         |
| Stop completely                                                                                                                                                              | 3.1%  |       |         |        |           |         |
| Stop temporarily                                                                                                                                                             | 20.4% |       |         |        |           |         |
| Reduce frequency                                                                                                                                                             | 35.2% |       |         |        |           |         |
| Reduce distance                                                                                                                                                              | 38.9% |       |         |        |           |         |
| Reduce speed                                                                                                                                                                 | 19.2% |       |         |        |           |         |
| Not change anything                                                                                                                                                          | 20.4% |       |         |        |           |         |
| <b>What percentage of your patients who are runners with KOA have you recommended that they modify their running habits?</b>                                                 |       |       |         |        |           |         |
| 0%                                                                                                                                                                           |       | 10.0% |         |        |           |         |
| 1-25%                                                                                                                                                                        |       | 31.7% |         |        |           |         |
| 26-50%                                                                                                                                                                       |       | 23.2% |         |        |           |         |
| 51-75%                                                                                                                                                                       |       | 17.2% |         |        |           |         |
| 76-99 %                                                                                                                                                                      |       | 10.2% |         |        |           |         |
| 100%                                                                                                                                                                         |       | 7.7%  |         |        |           |         |
| <b>What percentage of your patients who are runners with KOA have you recommended that they quit running?</b>                                                                |       |       |         |        |           |         |
| 0%                                                                                                                                                                           |       | 64.0% |         |        |           |         |
| 1-25%                                                                                                                                                                        |       | 29.3% |         |        |           |         |
| 26-50%                                                                                                                                                                       |       | 3.3%  |         |        |           |         |
| 51-75%                                                                                                                                                                       |       | 1.9%  |         |        |           |         |
| 76-99 %                                                                                                                                                                      |       | 0.6%  |         |        |           |         |
| 100%                                                                                                                                                                         |       | 0.9%  |         |        |           |         |
| <b>If a patient presents to you following a total knee joint replacement and wants to continue running, how likely are you to recommend that person to continue running?</b> |       |       |         |        |           |         |
| Not at all                                                                                                                                                                   |       | 7.2%  |         |        |           |         |
| Unlikely                                                                                                                                                                     |       | 40.6% |         |        |           |         |
| Uncertain                                                                                                                                                                    |       | 35.6% |         |        |           |         |
| Likely                                                                                                                                                                       |       | 13.8% |         |        |           |         |
| Definitely                                                                                                                                                                   |       | 2.7%  |         |        |           |         |

HCP, health care professional; KOA, knee osteoarthritis; PUB, general public.
